# Supplementary material
Source: Springer Nature journal article supplement (https://www.springermedizin.de/resource/supplementary/12931_2011_1156_MOESM3_ESM.pdf/9425424)

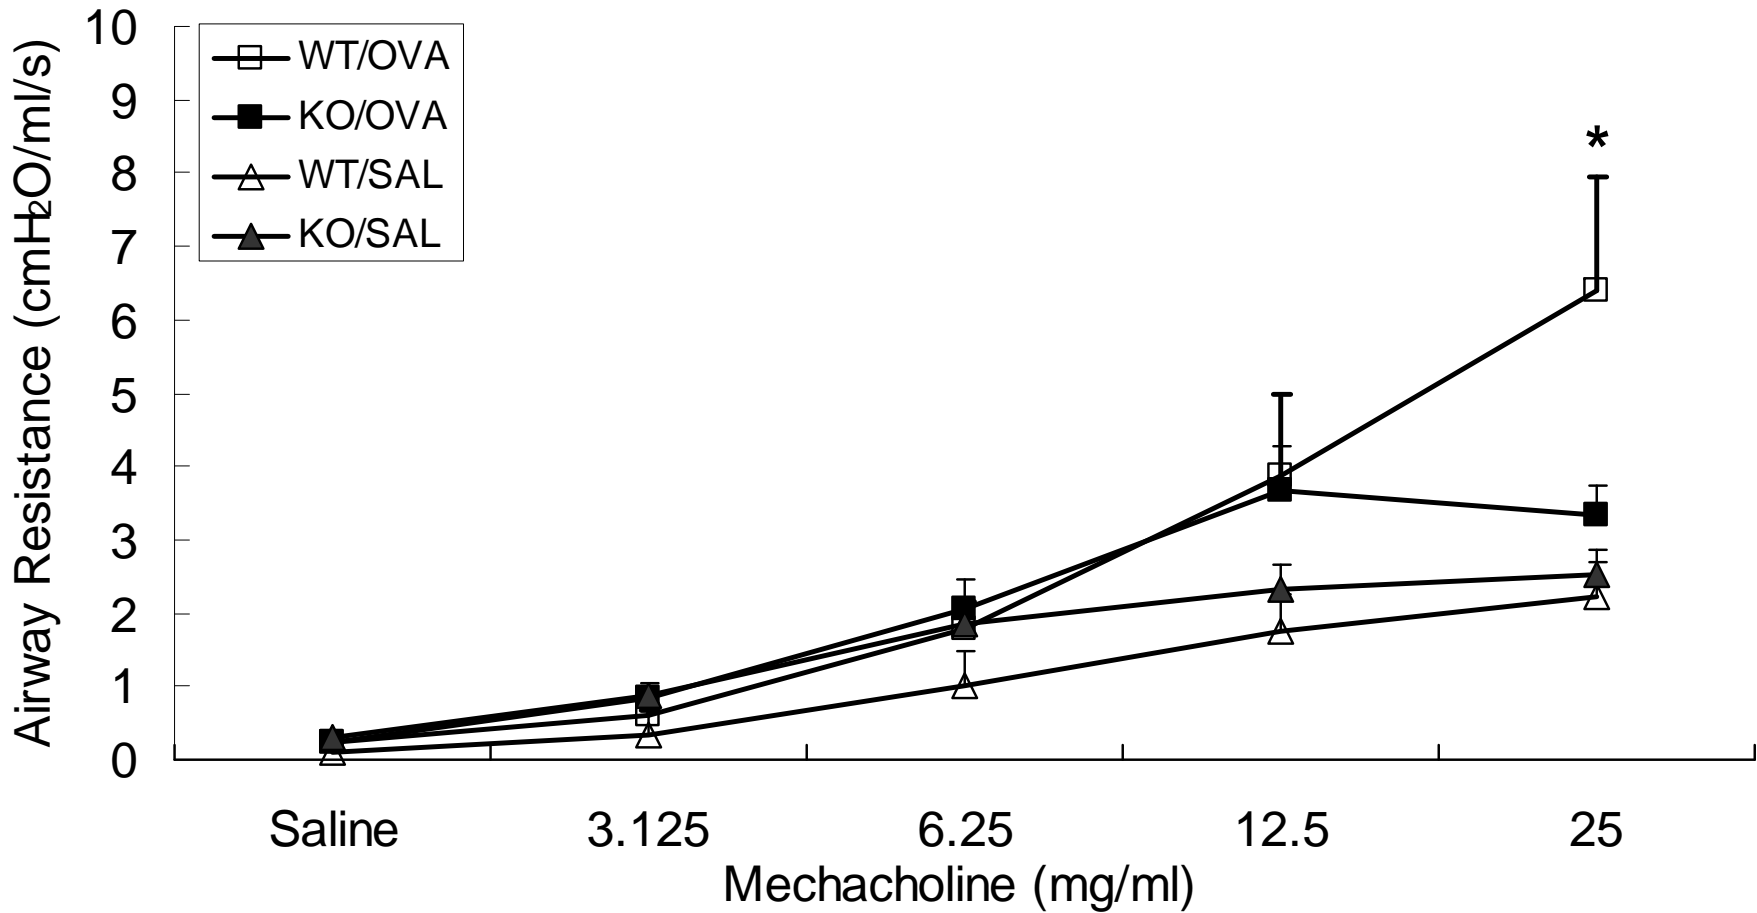

Supplement: MOESM3 [file 9425424]
